# Supplementary material for: Epidural Spinal Cord Stimulation for Spinal Cord Injury in Humans: A Systematic Review
Source: MDPI journal article supplement (doi:10.3390/jcm13041090), 2024-02-14
Supplement: s1 [file s1]

## Supplementary

**Table 1.** ROBINS-I Risk of Bias Analysis<sup>1</sup>.

|                                        | Bias due to<br>Confounding | Bias in Selection<br>of participants | Bias in<br>Classification of<br>interventions | Bias due to<br>deviations from<br>intended<br>interventions | Bias due to<br>missing data | Bias in<br>measurement of<br>outcomes | Bias in selection<br>of reported<br>result |
|----------------------------------------|----------------------------|--------------------------------------|-----------------------------------------------|-------------------------------------------------------------|-----------------------------|---------------------------------------|--------------------------------------------|
| Barolat (1986) <sup>[108]</sup>        | Serious                    | Serious                              | Serious                                       | Low                                                         | Low                         | Serious                               | Moderate                                   |
| Huang (2006) <sup>[33]</sup>           | Moderate                   | Serious                              | Moderate                                      | Low                                                         | Low                         | Serious                               | Low                                        |
| Monshonkina<br>(2012) <sup>[117]</sup> | Serious                    | Moderate                             | Serious                                       | Serious                                                     | Low                         | Serious                               | Moderate                                   |
| Minassian (2013)<br><sup>[119]</sup>   | Serious                    | Serious                              | Serious                                       | Low                                                         | Low                         | Serious                               | Moderate                                   |
| Lu (2016) <sup>[118]</sup>             | Serious                    | Moderate                             | Moderate                                      | Low                                                         | Low                         | Serious                               | Low                                        |
| Wagner (2018) <sup>[42]</sup>          | Moderate                   | Moderate                             | Moderate                                      | Moderate                                                    | Low                         | Serious                               | Low                                        |
| Calvert (2019) <sup>[43]</sup>         | Moderate                   | Moderate                             | Moderate                                      | Moderate                                                    | Low                         | Serious                               | Low                                        |
| Darrow (2019) <sup>[45]</sup>          | Serious                    | Moderate                             | Moderate                                      | Low                                                         | Low                         | Serious                               | Low                                        |
| Gorgey (2020) <sup>[46]</sup>          | Serious                    | Serious                              | Serious                                       | Moderate                                                    | Moderate                    | Serious                               | Moderate                                   |
| Calvert (2021) <sup>[48]</sup>         | Serious                    | Moderate                             | Serious                                       | Low                                                         | Low                         | Serious                               | Low                                        |
| Linde (2021) <sup>[50]</sup>           | Serious                    | Moderate                             | Moderate                                      | Low                                                         | Low                         | Serious                               | Low                                        |
| Gorgey (2022) <sup>[52]</sup>          | Serious                    | Serious                              | Serious                                       | Low                                                         | Low                         | Serious                               | Moderate                                   |
| Kandhari (2022) <sup>[144]</sup>       | Serious                    | Moderate                             | Moderate                                      | Low                                                         | Low                         | Serious                               | Low                                        |
| Rowald (2022) <sup>[53]</sup>          | Serious                    | Serious                              | Moderate                                      | Low                                                         | Low                         | Serious                               | Low                                        |
| Smith (2022) <sup>[116]</sup>          | Serious                    | Serious                              | Moderate                                      | Low                                                         | Low                         | Serious                               | Low                                        |
| Boakye (2023) <sup>[109]</sup>         | Serious                    | Moderate                             | Moderate                                      | Low                                                         | Low                         | Serious                               | Low                                        |
| Gorgey (2023) <sup>A [110]</sup>       | Serious                    | Serious                              | Serious                                       | Low                                                         | Low                         | Serious                               | Moderate                                   |
| Gupta (2023) <sup>[112]</sup>          | Serious                    | Serious                              | Serious                                       | Low                                                         | Low                         | Serious                               | Moderate                                   |
| Hoover (2023) <sup>[113]</sup>         | Serious                    | Moderate                             | Moderate                                      | Low                                                         | Low                         | Serious                               | Low                                        |

## Reference

Sterne, J.A.; Hernán, M.A.; Reeves, B.C.; Savović, J.; Berkman, N.D.; Viswanathan, M.; Henry, D.; Altman, D.G.; Ansari, M.T.; Boutron, I.; et al. ROBINS-I: A tool for assessing risk of bias in non-randomised studies of interventions. *BMJ* **2016**, *55*, i4919.
